# Supplementary material for: Hydrazinium-loaded perovskite solar cells with enhanced performance and stability
Source: Royal Society of Chemistry journal article supplement (doi:10.1039/c6ta08215g), 2016-01-01
Supplement: c6ta08215g1.pdf [file c6ta08215g1.pdf]

## Electronic supplementary information

# Hydrazinium-loaded perovskite solar cells with the enhanced performance and stability

Azat F. Akbulatov, Lyubov A. Frolova, Denis V. Anokhin, Kirill L. Gerasimov, Nadezhda N. Dremova and Pavel A. Troshin\*

### Contents

Fig. S1. Evolution of (110) peak of tetragonal phase of MAPbI<sub>3</sub> with increase of HA content.

Fig. S2. SEM images of MA<sub>0.3</sub>HA<sub>0.7</sub>PbI<sub>3</sub> and HAPbI<sub>3</sub> films.

Table S1. Photovoltaic characteristics of the best devices based on MA<sub>1-x</sub>HA<sub>x</sub>PbI<sub>3</sub>.

Fig. S3. *J-V* curves of the solar cells based on MA<sub>1-x</sub>HA<sub>x</sub>PbI<sub>3</sub> measured in the forward direction with the voltage sweeping rate of 100 mV/s.

Fig. S4. *J-V* curves of the device based on the MA<sub>0.9</sub>HA<sub>0.1</sub>PbI<sub>3</sub> perovskite measured at different scan rates with the forward (FS) and reverse (RS) voltage sweep directions.

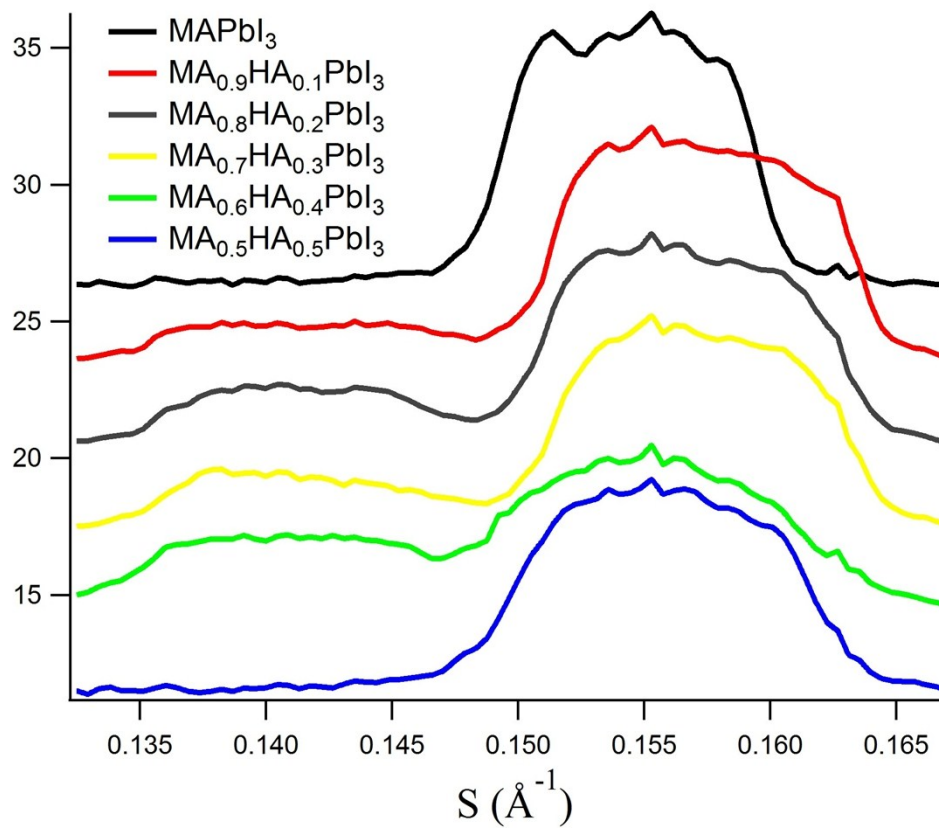

Fig. S1. Evolution of (110) peak of tetragonal phase of MAPbI<sub>3</sub> with increase of HA content.

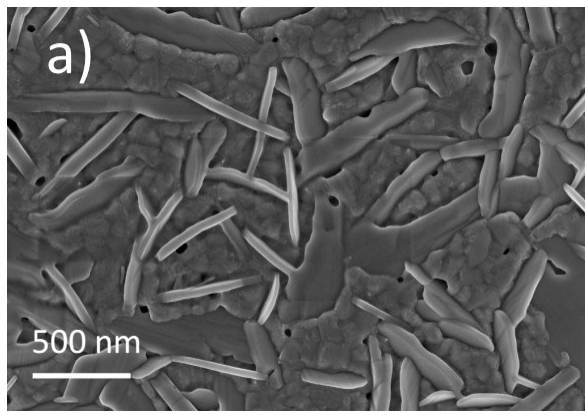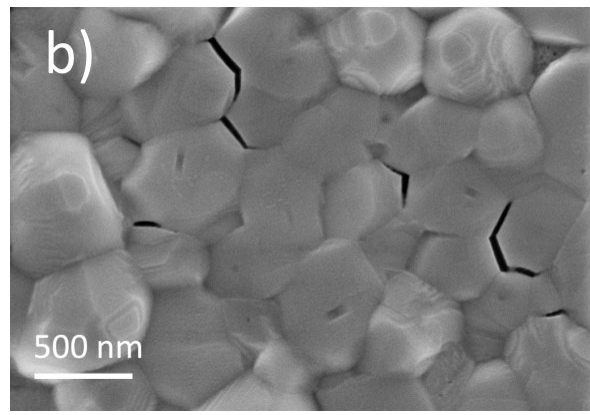

Fig. S2. SEM images of  $\text{MA}_{0.3}\text{HA}_{0.7}\text{PbI}_3$  and  $\text{HAPbI}_3$  films.

Table S1. Photovoltaic characteristics of the best devices based on MA<sub>1-x</sub>HA<sub>x</sub>PbI<sub>3</sub>.

| HA concentration | V <sub>oc</sub> , mV | J <sub>sc</sub> , mA/cm <sup>2</sup> | FF, %     | η, %        |
|------------------|----------------------|--------------------------------------|-----------|-------------|
| 0                | 941                  | 14.1                                 | 76        | 10.1        |
| 0.05             | 920                  | 15.4                                 | 73        | 10.3        |
| <b>0.1</b>       | <b>927</b>           | <b>16.9</b>                          | <b>74</b> | <b>11.6</b> |
| 0.2              | 899                  | 15.6                                 | 71        | 10.0        |
| 0.3              | 804                  | 12.6                                 | 71        | 7.2         |
| 0.4              | 829                  | 9.5                                  | 70        | 5.5         |
| 0.5              | 871                  | 4.3                                  | 51        | 1.9         |
| 0.6              | 896                  | 0.9                                  | 56        | 0.5         |
| 0.8              | 385                  | 0.1                                  | 29        | 0.008       |
| 1                | 101                  | 0.08                                 | 26        | 0.002       |

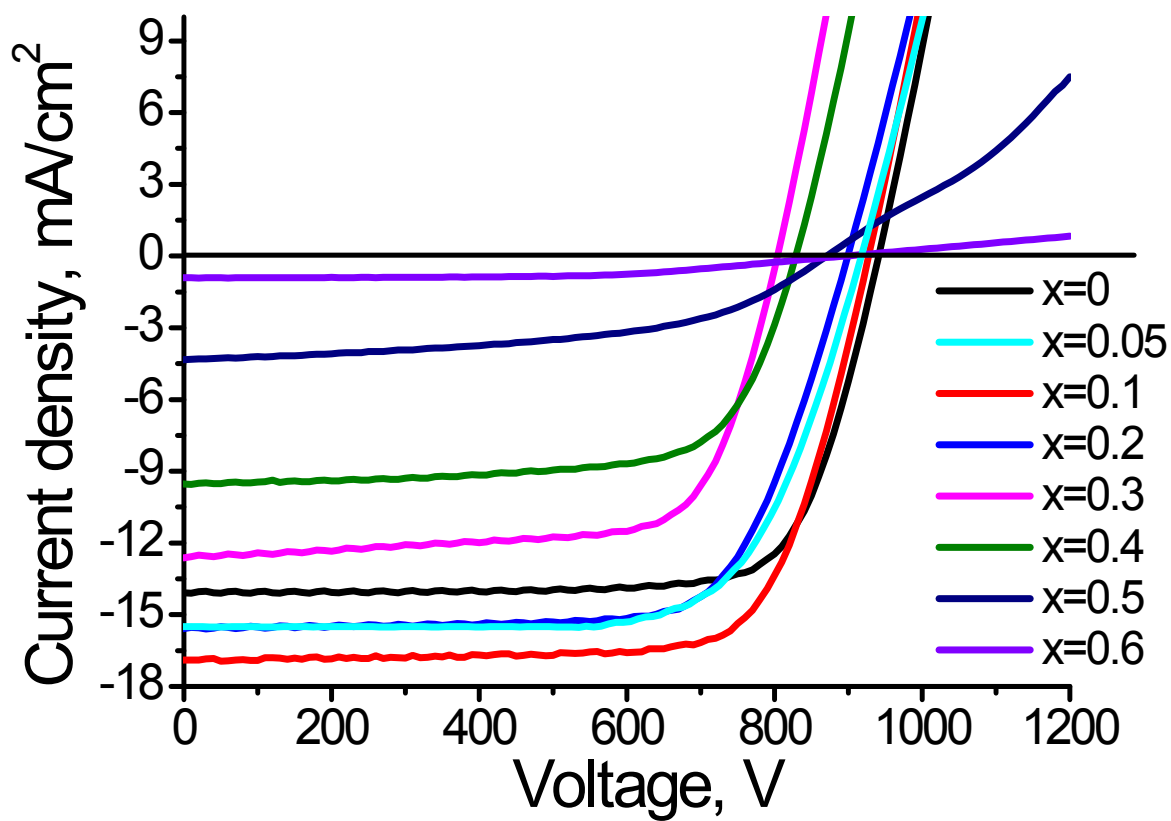

Fig. S3.  $J$ - $V$  curves of the solar cells based on  $\text{MA}_{1-x}\text{HA}_x\text{PbI}_3$  measured in the forward direction with the voltage sweeping rate of 100 mV/s.

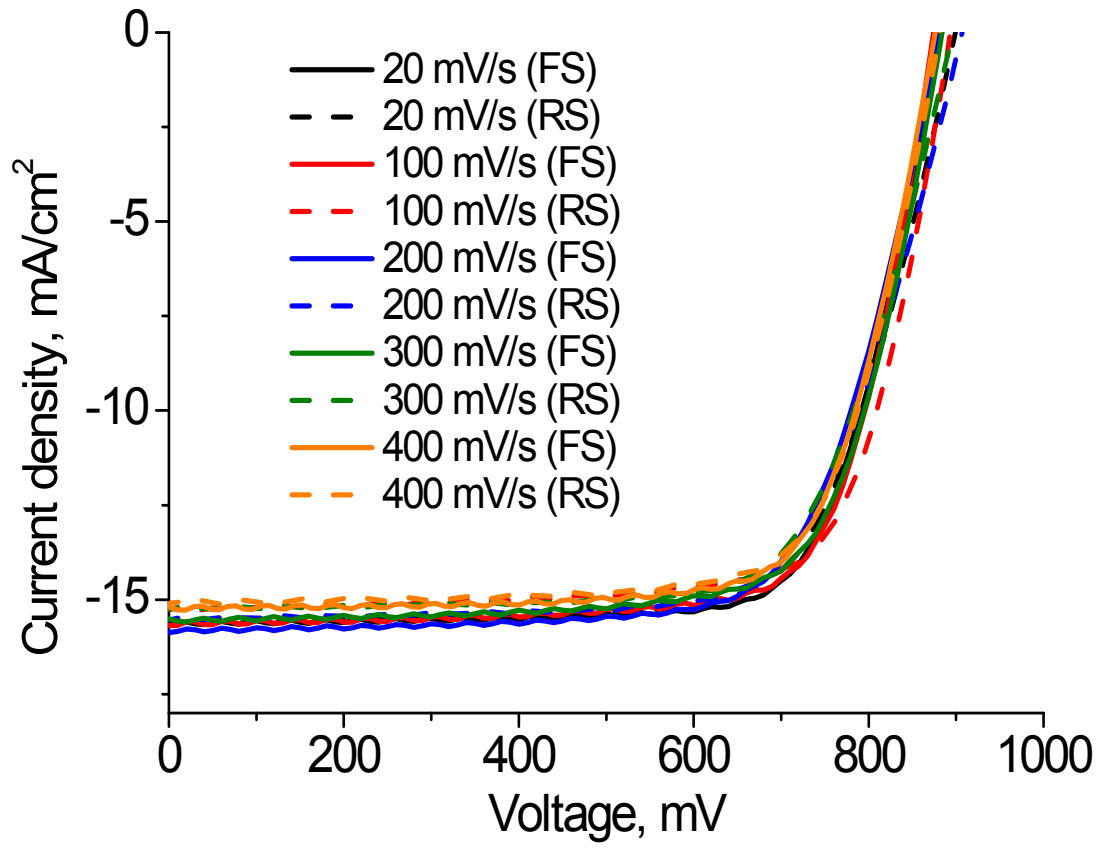

Fig. S4.  $J$ - $V$  curves of the device based on the MA<sub>0.9</sub>HA<sub>0.1</sub>PbI<sub>3</sub> perovskite measured at different scan rates with the forward (FS) and reverse (RS) voltage sweep directions.
